# Supplementary material
Source: bioRxiv or medRxiv preprint supplement (https://www.biorxiv.org/highwire/filestream/42238/field_highwire_adjunct_files/1/142927-2.pdf)
Supplement: Supplementary file [file 142927-2.pdf]

**Table S1. Subject demographics**

| Union of subjects across xQTL types, <i>N</i> = 494 | Mean or percentage | Standard deviation or [count] |
|-----------------------------------------------------|--------------------|-------------------------------|
| Age at death (years)                                | 88.43              | 6.63                          |
| Age at enrollment (years)                           | 81.39              | 7.09                          |
| Years of education                                  | 16.47              | 3.47                          |
| Male                                                | 37.90%             | [187]                         |
| Pathological AD                                     | 58.30%             | [288]                         |
| Clinical AD                                         | 38.30%             | [189]                         |

| Intersection of subjects across xQTL types, <i>N</i> = 411 | Mean or percentage | Standard deviation or [count] |
|------------------------------------------------------------|--------------------|-------------------------------|
| Age at death (years)                                       | 88.83              | 6.55                          |
| Age at enrollment (years)                                  | 81.66              | 6.94                          |
| Years of education                                         | 16.58              | 3.41                          |
| Male                                                       | 36.50%             | [150]                         |
| Pathological AD                                            | 58.90%             | [242]                         |
| Clinical AD                                                | 37.20%             | [153]                         |

**Table S2. Provenance of omic datasets**

| <b>Data type</b> | <b>Initial report of genome-wide data</b>  | <b>Theme of original manuscript</b>                                              | <b>Prior QTL analysis</b> |
|------------------|--------------------------------------------|----------------------------------------------------------------------------------|---------------------------|
| Genotypes        | De Jager <i>et al Neurobiol Aging</i> 2012 | GWAS of cognitive decline                                                        | none                      |
| DNA methylation  | De Jager <i>et al Nat Neurosci</i> 2014    | Methylome-wide association study for amyloid plaques                             | none                      |
| RNA sequence     | Lim <i>et al. Nat Comm</i> 2017            | Assessment of circadian and seasonal rhythms in brain RNAseq data                | none                      |
| H3K9Ac profiles  | Lim <i>et al. Nat Comm</i> 2017            | Assessment of circadian and seasonal rhythms in brain RNAseq and epigenomic data | none                      |

**Table S3. Replication based on  $\pi_1$**

$\pi_1$  estimated as the proportion of reported eQTLs and mQTLs in previous studies that appear significant in our estimated xQTL associations. mQTL and haQTL associations were also converted to eQTL associations to examine their replication rates on reported eQTLs in previous studies.

| eQTL studies |        | Braineac |        |        |        |        |        |        |        |        |        |        |        |        | GENRED   |  | ImmVar |  |
|--------------|--------|----------|--------|--------|--------|--------|--------|--------|--------|--------|--------|--------|--------|--------|----------|--|--------|--|
| xQTL type    | window | aveALL   | CRBL   | FCTX   | HIPP   | MEDU   | OCTX   | PUTH   | SNIG   | TCTX   | THAL   | WHMT   | Blood  | CD4    | Monocyte |  |        |  |
| eQTL         | 1MB    | 0.5986   | 0.5376 | 0.5585 | 0.5479 | 0.7056 | 0.7432 | 0.6799 | 0.4291 | 0.5697 | 0.5617 | 0.5834 | 0.6347 | 0.6679 | 0.6053   |  |        |  |
| eQTL         | 100KB  | 0.7123   | 0.7519 | 0.8821 | 0.7494 | 0.8566 | 0.8202 | 0.7658 | 0.7061 | 0.7476 | 0.8158 | 0.7418 | 0.6660 | 0.7623 | 0.6739   |  |        |  |
| mQTL         | 5KB    | 0.4030   | 0.3784 | 0.4764 | 0.3390 | 0.3715 | 0.5567 | 0.4666 | 0.3074 | 0.4075 | 0.3462 | 0.4252 | 0.3113 | 0.3693 | 0.4384   |  |        |  |
| mQTL         | 100KB  | 0.2096   | 0.2436 | 0.2251 | 0.2412 | 0.2471 | 0.2521 | 0.2826 | 0.3449 | 0.2035 | 0.2471 | 0.2385 | 0.2064 | 0.2089 | 0.2333   |  |        |  |
| haQTL        | 1MB    | 0.1607   | 0.1798 | 0.1911 | 0.2394 | 0.3498 | 0.2251 | 0.2579 | 0.1215 | 0.1231 | 0.0744 | 0.2347 | 0.1248 | 0.1728 | 0.2240   |  |        |  |
| haQTL        | 100KB  | 0.3175   | 0.3789 | 0.3813 | 0.4920 | 0.5743 | 0.5247 | 0.4403 | 0.3744 | 0.3571 | 0.2200 | 0.4664 | 0.2768 | 0.3747 | 0.4571   |  |        |  |

| mQTL studies |        | Hannon |
|--------------|--------|--------|
| xQTL type    | window | Brain  |
| mQTL         | 5KB    | 0.8720 |
| mQTL         | 100KB  | 0.8710 |

**Table S4. Sharing of xQTL SNPs based on  $\pi_1$**

$\pi_1$  estimated as the proportion of xQTL associations for a “test” phenotype with the same xQTL SNPs

as a “discovery” phenotype that appear significant

Only the closest molecular feature to each xQTL SNP was used in the  $\pi_1$  estimation

| Window<br>xQTL | 1Mb<br>eQTL | 5Kb<br>mQTL | 1Mb<br>haQTL | 1Mb<br>eQTL | 5Kb<br>mQTL | 40Kb<br>haQTL | 1Mb<br>eQTL | 5Kb<br>mQTL | 2Kb<br>haQTL | 100Kb<br>eQTL | 100Kb<br>mQTL | 100Kb<br>haQTL |
|----------------|-------------|-------------|--------------|-------------|-------------|---------------|-------------|-------------|--------------|---------------|---------------|----------------|
| eQTL           | NA          | 0.4430      | 0.4138       | NA          | 0.4430      | 0.4074        | NA          | 0.4430      | 0.4167       | NA            | 0.3982        | 0.4519         |
| mQTL           | 0.4947      | NA          | 0.4129       | 0.4947      | NA          | 0.4469        | 0.4947      | NA          | 0.5276       | 0.6168        | NA            | 0.3946         |
| haQTL          | 0.4545      | 0.6250      | NA           | 0.5200      | 0.5882      | NA            | 0.4815      | 0.5238      | NA           | 0.5319        | 0.5814        | NA             |

**Table S5. Mediation analysis based on causal inference test**

Notation                   Methy & Acety = represent epigenome with first PC of histone acetylation peaks and methylation probes associated with a given shared xQTL SNP  
Methy Only = represent epigenome with first PC of methylation probes associated with a given shared xQTL SNP  
Acety Only = represent epigenome with first PC of histone acetylation peaks associated with a given shared xQTL SNP  
*m* = 20,916 tested association sets

Model determination    pCausal < 0.05/*m* & pReact > 0.05/*m* => Causal  
pCausal > 0.05/*m* & pReact < 0.05/*m* => Reactive  
pCausal > 0.05/*m* & pReact > 0.05/*m* => Independent  
Otherwise => Unclassified

| Methy & Acety     | Causal | Reactive | Indep | Unclassified | Total  |
|-------------------|--------|----------|-------|--------------|--------|
| #Association sets | 1893   | 726      | 17699 | 598          | 20916  |
| Percentage (%)    | 9.05   | 3.47     | 84.62 | 2.86         | 100.00 |

| Methy Only        | Causal | Reactive | Indep | Unclear | Total  |
|-------------------|--------|----------|-------|---------|--------|
| #Association sets | 685    | 586      | 19342 | 303     | 20916  |
| Percentage (%)    | 3.28   | 2.80     | 92.47 | 1.45    | 100.00 |

| Acety Only        | Causal | Reactive | Indep | Unclear | Total  |
|-------------------|--------|----------|-------|---------|--------|
| #Association sets | 1230   | 1204     | 17992 | 490     | 20916  |
| Percentage (%)    | 5.88   | 5.76     | 86.02 | 2.34    | 100.00 |

**Table S6A. Partitioned heritability of all xQTL SNPs**

Stratified LD score regression applied to estimate partitioned heritability with all xQTL SNPs as one category and all SNPs as background.

Window sizes for eQTL, mQTL, and haQTL analysis were 1Mb, 5Kb, and 1Mb, respectively

Prop.\_SNPs = 0.10

Prop.\_h2 denotes proportion of heritability

| GWAS dataset                                  | #Subjects |          | All xQTL SNPs |                    |            |                      |              |  |
|-----------------------------------------------|-----------|----------|---------------|--------------------|------------|----------------------|--------------|--|
|                                               | Cases     | Controls | Prop._h2      | Prop._h2_std_error | Enrichment | Enrichment_std_error | Enrichment_p |  |
| ADHD PGC                                      | 2960      | 6583     | -1.62E-01     | 2.39E-01           | -1.55E+00  | 2.28E+00             | 1.54E-01     |  |
| Alzheimer IGAP (stage 1)                      | 17008     | 37154    | 5.42E-01      | 1.33E-01           | 5.19E+00   | 1.27E+00             | 2.48E-06     |  |
| Anxiety ANGST (case-control)                  | 17130     |          | 9.14E-02      | 1.20E-01           | 8.75E-01   | 1.15E+00             | 9.13E-01     |  |
| Anxiety ANGST (factor score)                  | 18186     |          | 1.68E-01      | 1.57E-01           | 1.60E+00   | 1.50E+00             | 6.61E-01     |  |
| Autism PGC                                    | 5305      | 5305     | 1.37E-01      | 5.71E-02           | 1.31E+00   | 5.46E-01             | 5.69E-01     |  |
| Bipolar PGC                                   | 11974     | 51792    | 3.04E-01      | 4.75E-02           | 2.91E+00   | 4.55E-01             | 6.17E-06     |  |
| BipolarVsSchizo PGC (bipolar only)            | 10410     | 19423    | 3.36E-01      | 5.43E-02           | 3.21E+00   | 5.20E-01             | 7.70E-06     |  |
| MDD CONVERGE                                  | 5303      | 5337     | 2.25E-01      | 1.13E-01           | 2.16E+00   | 1.08E+00             | 1.75E-01     |  |
| Schizophrenia2 PGC                            | 36989     | 113075   | 2.43E-01      | 1.97E-02           | 2.32E+00   | 1.88E-01             | 5.76E-11     |  |
| BipolarVsSchizo PGC (schizo only)             | 9369      | 19423    | 2.41E-01      | 3.38E-02           | 2.31E+00   | 3.24E-01             | 2.19E-05     |  |
| BMI GIANT (BMI) 2010                          | NA        | 249796   | 2.49E-01      | 2.96E-02           | 2.38E+00   | 2.83E-01             | 1.52E-06     |  |
| BMI GIANT (Height) 2010                       | NA        | 183727   | 4.51E-01      | 3.61E-02           | 4.31E+00   | 3.45E-01             | 3.77E-19     |  |
| Bowel Disease IBD (Europe Crohn's Disease)    | 5956      | 21770    | 6.07E-01      | 1.04E-01           | 5.81E+00   | 9.94E-01             | 2.95E-10     |  |
| Bowel Disease IBD (Europe Ulcerative Colitis) | 6968      | 21770    | 7.82E-01      | 1.35E-01           | 7.48E+00   | 1.29E+00             | 4.46E-09     |  |
| Bowel Disease IBD (Europe IBD)                | 12924     | 21770    | 6.66E-01      | 9.94E-02           | 6.38E+00   | 9.51E-01             | 9.44E-14     |  |
| Diabetes DIAGRAM Trans-ethnic T2D GWAS        | 27206     | 57574    | 4.42E-01      | 6.33E-02           | 4.23E+00   | 6.05E-01             | 9.89E-12     |  |

**Table S6B. Partitioned heritability of all xQTL SNPs**

Stratified LD score regression applied to estimate partitioned heritability with all xQTL SNPs as one category and LDSC baseline with all 53 categories as background.

Window sizes for eQTL, mQTL, and haQTL analysis were 1Mb, 5Kb, and 1Mb, respectively

Prop.\_SNPs = 0.10

Prop.\_h2 denotes proportion of heritability

| GWAS dataset                                  | #Subjects |          | All xQTL SNPs |                    |            |                      |              |  |
|-----------------------------------------------|-----------|----------|---------------|--------------------|------------|----------------------|--------------|--|
|                                               | Cases     | Controls | Prop._h2      | Prop._h2_std_error | Enrichment | Enrichment_std_error | Enrichment_p |  |
| ADHD PGC                                      | 2960      | 6583     | -3.32E-02     | 1.38E-01           | -3.17E-01  | 1.32E+00             | 2.74E-01     |  |
| Alzheimer IGAP (stage 1)                      | 17008     | 37154    | 1.72E-01      | 6.40E-02           | 1.65E+00   | 6.12E-01             | 2.82E-01     |  |
| Anxiety ANGST (case-control)                  | 17130     |          | 1.25E-01      | 1.29E-01           | 1.20E+00   | 1.24E+00             | 8.69E-01     |  |
| Anxiety ANGST (factor score)                  | 18186     |          | 2.22E-01      | 1.98E-01           | 2.12E+00   | 1.89E+00             | 4.51E-01     |  |
| Autism PGC                                    | 5305      | 5305     | 1.08E-01      | 4.69E-02           | 1.03E+00   | 4.49E-01             | 9.49E-01     |  |
| Bipolar PGC                                   | 11974     | 51792    | 2.19E-01      | 4.44E-02           | 2.09E+00   | 4.25E-01             | 5.91E-03     |  |
| BipolarVsSchizo PGC (bipolar only)            | 10410     | 19423    | 2.03E-01      | 4.23E-02           | 1.94E+00   | 4.04E-01             | 1.56E-02     |  |
| MDD CONVERGE                                  | 5303      | 5337     | 1.93E-01      | 1.34E-01           | 1.85E+00   | 1.28E+00             | 4.34E-01     |  |
| Schizophrenia2 PGC                            | 36989     | 113075   | 1.89E-01      | 1.90E-02           | 1.80E+00   | 1.82E-01             | 1.38E-05     |  |
| BipolarVsSchizo PGC (schizo only)             | 9369      | 19423    | 1.67E-01      | 2.62E-02           | 1.60E+00   | 2.51E-01             | 1.16E-02     |  |
| BMI GIANT (BMI) 2010                          | NA        | 249796   | 2.07E-01      | 2.59E-02           | 1.98E+00   | 2.47E-01             | 1.21E-04     |  |
| BMI GIANT (Height) 2010                       | NA        | 183727   | 2.16E-01      | 2.26E-02           | 2.07E+00   | 2.16E-01             | 4.20E-06     |  |
| Bowel Disease IBD (Europe Crohn's Disease)    | 5956      | 21770    | 2.09E-01      | 4.50E-02           | 2.00E+00   | 4.31E-01             | 1.40E-02     |  |
| Bowel Disease IBD (Europe Ulcerative Colitis) | 6968      | 21770    | 2.91E-01      | 6.91E-02           | 2.79E+00   | 6.61E-01             | 5.35E-03     |  |
| Bowel Disease IBD (Europe IBD)                | 12924     | 21770    | 2.34E-01      | 4.77E-02           | 2.24E+00   | 4.56E-01             | 2.47E-03     |  |
| Diabetes DIAGRAM Trans-ethnic T2D GWAS        | 27206     | 57574    | 2.21E-01      | 3.92E-02           | 2.11E+00   | 3.75E-01             | 9.33E-04     |  |

**Table S6C. Partitioned heritability of all xQTL SNPs shared between any xQTL types and all other xQTL SNPs**

Stratified LD score regression applied to estimate partitioned heritability with all shared xQTL SNPs as one category, all other xQTL SNPs as another category, and all SNPs as background  
 Window sizes for eQTL, mQTL, and haQTL analysis were 1Mb, 5Kb, and 1Mb, respectively  
 Prop.\_SNPs = 0.02 and 0.09 for shared xQTL SNPs and all other xQTL SNPs, respectively  
 Prop.\_h2 denotes proportion of heritability

| Disease Study                                 | #Subjects |          | All xQTL SNPs that are shared across any xQTL types |                    |            |                      |              | Enrichment_p |
|-----------------------------------------------|-----------|----------|-----------------------------------------------------|--------------------|------------|----------------------|--------------|--------------|
|                                               | Cases     | Controls | Prop._h2                                            | Prop._h2_std_error | Enrichment | Enrichment_std_error | Enrichment_p |              |
| ADHD PGC                                      | 2960      | 6583     | -1.02E-02                                           | 5.87E-02           | -6.48E-01  | 3.73E+00             | 6.39E-01     |              |
| Alzheimer IGAP (stage 1)                      | 17008     | 37154    | 2.99E-02                                            | 3.47E-02           | 1.90E+00   | 2.20E+00             | 6.81E-01     |              |
| Anxiety ANGST (case-control)                  | 17130     |          | -8.04E-02                                           | 4.85E-02           | -5.11E+00  | 3.08E+00             | 1.17E-02     |              |
| Anxiety ANGST (factor score)                  | 18186     |          | 4.87E-03                                            | 4.74E-02           | 3.09E-01   | 3.01E+00             | 8.16E-01     |              |
| Autism PGC                                    | 5305      | 5305     | 9.78E-03                                            | 1.99E-02           | 6.21E-01   | 1.26E+00             | 7.65E-01     |              |
| Bipolar PGC                                   | 11974     | 51792    | 6.16E-02                                            | 2.13E-02           | 3.91E+00   | 1.35E+00             | 2.31E-02     |              |
| BipolarVsSchizo PGC (bipolar only)            | 10410     | 19423    | 6.42E-02                                            | 2.28E-02           | 4.08E+00   | 1.45E+00             | 3.10E-02     |              |
| MDD CONVERGE                                  | 5303      | 5337     | 2.42E-02                                            | 2.95E-02           | 1.53E+00   | 1.88E+00             | 7.71E-01     |              |
| Schizophrenia2 PGC                            | 36989     | 113075   | 4.02E-02                                            | 9.67E-03           | 2.56E+00   | 6.15E-01             | 1.32E-02     |              |
| BipolarVsSchizo PGC (schizo only)             | 9369      | 19423    | 4.82E-02                                            | 1.42E-02           | 3.06E+00   | 9.00E-01             | 2.16E-02     |              |
| BMI GIANT (BMI) 2010                          | NA        | 249796   | 4.07E-02                                            | 1.23E-02           | 2.58E+00   | 7.80E-01             | 4.29E-02     |              |
| BMI GIANT (Height) 2010                       | NA        | 183727   | 5.34E-02                                            | 1.51E-02           | 3.39E+00   | 9.59E-01             | 1.18E-02     |              |
| Bowel Disease IBD (Europe Crohn's Disease)    | 5956      | 21770    | 5.83E-02                                            | 2.46E-02           | 3.71E+00   | 1.56E+00             | 6.21E-02     |              |
| Bowel Disease IBD (Europe Ulcerative Colitis) | 6968      | 21770    | 9.29E-02                                            | 4.40E-02           | 5.90E+00   | 2.79E+00             | 7.97E-02     |              |
| Bowel Disease IBD (Europe IBD)                | 12924     | 21770    | 7.53E-02                                            | 3.00E-02           | 4.79E+00   | 1.91E+00             | 3.74E-02     |              |
| Diabetes DIAGRAM Trans-ethnic T2D GWAS        | 27206     | 57574    | 4.70E-02                                            | 2.14E-02           | 2.99E+00   | 1.36E+00             | 1.40E-01     |              |



**Table S6C. Partitioned heritability of all xQTL SNPs shared between any xQTL types and all other xQTL SNPs**

Stratified LD score regression applied to estimate partitioned heritability with all shared xQTL SNPs as one category, all other xQTL SNPs as another category, and all SNPs as background  
 Window sizes for eQTL, mQTL, and haQTL analysis were 1Mb, 5Kb, and 1Mb, respectively  
 Prop.\_SNPs = 0.02 and 0.09 for shared xQTL SNPs and all other xQTL SNPs, respectively  
 Prop.\_h2 denotes proportion of heritability

| Disease Study                                 | #Subjects |          | All other xQTL SNPs |                    |            |                      |              | Enrichment_p |
|-----------------------------------------------|-----------|----------|---------------------|--------------------|------------|----------------------|--------------|--------------|
|                                               | Cases     | Controls | Prop._h2            | Prop._h2_std_error | Enrichment | Enrichment_std_error | Enrichment_p |              |
| ADHD PGC                                      | 2960      | 6583     | -1.68E-01           | 2.24E-01           | -1.89E+00  | 2.52E+00             | 1.52E-01     |              |
| Alzheimer IGAP (stage 1)                      | 17008     | 37154    | 5.51E-01            | 1.40E-01           | 6.20E+00   | 1.58E+00             | 9.94E-07     |              |
| Anxiety ANGST (case-control)                  | 17130     | 17130    | 2.72E-01            | 1.56E-01           | 3.06E+00   | 1.76E+00             | 1.53E-01     |              |
| Anxiety ANGST (factor score)                  | 18186     | 18186    | 1.84E-01            | 1.80E-01           | 2.07E+00   | 2.02E+00             | 5.49E-01     |              |
| Autism PGC                                    | 5305      | 5305     | 1.38E-01            | 6.30E-02           | 1.55E+00   | 7.09E-01             | 4.36E-01     |              |
| Bipolar PGC                                   | 11974     | 51792    | 2.30E-01            | 4.72E-02           | 2.60E+00   | 5.32E-01             | 2.51E-03     |              |
| BipolarVsSchizo PGC (bipolar only)            | 10410     | 19423    | 2.62E-01            | 5.15E-02           | 2.95E+00   | 5.80E-01             | 5.11E-04     |              |
| MDD CONVERGE                                  | 5303      | 5337     | 2.10E-01            | 1.21E-01           | 2.37E+00   | 1.36E+00             | 2.28E-01     |              |
| Schizophrenia2 PGC                            | 36989     | 113075   | 2.01E-01            | 2.23E-02           | 2.26E+00   | 2.52E-01             | 9.36E-07     |              |
| BipolarVsSchizo PGC (schizo only)             | 9369      | 19423    | 1.84E-01            | 3.93E-02           | 2.08E+00   | 4.42E-01             | 1.25E-02     |              |
| BMI GIANT (BMI) 2010                          | NA        | 249796   | 2.06E-01            | 2.78E-02           | 2.32E+00   | 3.13E-01             | 2.70E-05     |              |
| BMI GIANT (Height) 2010                       | NA        | 183727   | 4.06E-01            | 3.76E-02           | 4.57E+00   | 4.23E-01             | 5.20E-15     |              |
| Bowel Disease IBD (Europe Crohn's Disease)    | 5956      | 21770    | 5.70E-01            | 9.65E-02           | 6.42E+00   | 1.09E+00             | 1.67E-09     |              |
| Bowel Disease IBD (Europe Ulcerative Colitis) | 6968      | 21770    | 7.04E-01            | 1.35E-01           | 7.93E+00   | 1.52E+00             | 6.43E-08     |              |
| Bowel Disease IBD (Europe IBD)                | 12924     | 21770    | 6.05E-01            | 9.58E-02           | 6.82E+00   | 1.08E+00             | 3.98E-11     |              |
| Diabetes DIAGRAM Trans-ethnic T2D GWAS        | 27206     | 57574    | 4.09E-01            | 6.53E-02           | 4.60E+00   | 7.35E-01             | 1.38E-09     |              |

**Table S7A. Partitioned heritability of all xQTL SNPs**

Stratified LD score regression applied to estimate partitioned heritability with all xQTL SNPs as one category and all SNPs as background.

Window sizes for eQTL, mQTL, and haQTL analysis were 100Kb, 100Kb, and 100Kb, respectively

Prop.\_SNPs = 0.23

Prop.\_h2 denotes proportion of heritability

| GWAS dataset                                  | #Subjects |          | All xQTL SNPs |                    |            |                      |              |  |
|-----------------------------------------------|-----------|----------|---------------|--------------------|------------|----------------------|--------------|--|
|                                               | Cases     | Controls | Prop._h2      | Prop._h2_std_error | Enrichment | Enrichment_std_error | Enrichment_p |  |
| ADHD PGC                                      | 2960      | 6583     | 6.95E-02      | 2.98E-01           | 3.04E-01   | 1.30E+00             | 5.57E-01     |  |
| Alzheimer IGAP (stage 1)                      | 17008     | 37154    | 8.80E-01      | 1.86E-01           | 3.86E+00   | 8.13E-01             | 7.06E-08     |  |
| Anxiety ANGST (case-control)                  | 17130     |          | 3.60E-01      | 2.14E-01           | 1.58E+00   | 9.38E-01             | 4.84E-01     |  |
| Anxiety ANGST (factor score)                  | 18186     |          | 2.49E-01      | 2.02E-01           | 1.09E+00   | 8.85E-01             | 9.17E-01     |  |
| Autism PGC                                    | 5305      | 5305     | 3.82E-01      | 7.50E-02           | 1.67E+00   | 3.29E-01             | 3.45E-02     |  |
| Bipolar PGC                                   | 11974     | 51792    | 4.90E-01      | 5.48E-02           | 2.15E+00   | 2.40E-01             | 1.85E-07     |  |
| BipolarVsSchizo PGC (bipolar only)            | 10410     | 19423    | 5.40E-01      | 6.87E-02           | 2.37E+00   | 3.01E-01             | 4.45E-07     |  |
| MDD CONVERGE                                  | 5303      | 5337     | 3.23E-01      | 1.37E-01           | 1.41E+00   | 5.98E-01             | 4.16E-01     |  |
| Schizophrenia2 PGC                            | 36989     | 113075   | 4.10E-01      | 2.19E-02           | 1.79E+00   | 9.59E-02             | 1.72E-14     |  |
| BipolarVsSchizo PGC (schizo only)             | 9369      | 19423    | 4.37E-01      | 4.35E-02           | 1.91E+00   | 1.91E-01             | 3.55E-07     |  |
| BMI GIANT (BMI) 2010                          | NA        | 249796   | 3.98E-01      | 3.69E-02           | 1.74E+00   | 1.62E-01             | 2.44E-06     |  |
| BMI GIANT (Height) 2010                       | NA        | 183727   | 6.91E-01      | 3.87E-02           | 3.03E+00   | 1.69E-01             | 8.70E-25     |  |
| Bowel Disease IBD (Europe Crohn's Disease)    | 5956      | 21770    | 9.34E-01      | 1.14E-01           | 4.09E+00   | 4.99E-01             | 7.63E-17     |  |
| Bowel Disease IBD (Europe Ulcerative Colitis) | 6968      | 21770    | 1.11E+00      | 1.45E-01           | 4.85E+00   | 6.35E-01             | 3.23E-14     |  |
| Bowel Disease IBD (Europe IBD)                | 12924     | 21770    | 1.04E+00      | 1.09E-01           | 4.55E+00   | 4.76E-01             | 4.99E-20     |  |
| Diabetes DIAGRAM Trans-ethnic T2D GWAS        | 27206     | 57574    | 6.57E-01      | 7.74E-02           | 2.88E+00   | 3.39E-01             | 1.01E-11     |  |

**Table S7B. Partitioned heritability of all xQTL SNPs**

Stratified LD score regression applied to estimate partitioned heritability with all xQTL SNPs as one category and LDSC baseline with all 53 categories as background.

Window sizes for eQTL, mQTL, and haQTL analysis were 100Kb, 100Kb, and 100Kb, respectively

Prop.\_SNPs = 0.23

Prop.\_h2 denotes proportion of heritability

| GWAS dataset                                  | #Subjects |          | All xQTL SNPs |                    |            |                      |              |
|-----------------------------------------------|-----------|----------|---------------|--------------------|------------|----------------------|--------------|
|                                               | Cases     | Controls | Prop._h2      | Prop._h2_std_error | Enrichment | Enrichment_std_error | Enrichment_p |
| ADHD PGC                                      | 2960      | 6583     | 2.41E-01      | 2.32E-01           | 1.06E+00   | 1.02E+00             | 9.54E-01     |
| Alzheimer IGAP (stage 1)                      | 17008     | 37154    | 4.41E-01      | 8.83E-02           | 1.93E+00   | 3.87E-01             | 5.25E-03     |
| Anxiety ANGST (case-control)                  | 17130     |          | 8.36E-01      | 7.59E-01           | 3.66E+00   | 3.32E+00             | 6.21E-02     |
| Anxiety ANGST (factor score)                  | 18186     |          | 3.54E-01      | 3.17E-01           | 1.55E+00   | 1.39E+00             | 6.33E-01     |
| Autism PGC                                    | 5305      | 5305     | 3.40E-01      | 6.44E-02           | 1.49E+00   | 2.82E-01             | 5.47E-02     |
| Bipolar PGC                                   | 11974     | 51792    | 4.32E-01      | 5.86E-02           | 1.89E+00   | 2.57E-01             | 5.70E-05     |
| BipolarVsSchizo PGC (bipolar only)            | 10410     | 19423    | 4.84E-01      | 7.25E-02           | 2.12E+00   | 3.17E-01             | 3.32E-05     |
| MDD CONVERGE                                  | 5303      | 5337     | 2.51E-01      | 1.65E-01           | 1.10E+00   | 7.23E-01             | 8.87E-01     |
| Schizophrenia2 PGC                            | 36989     | 113075   | 3.81E-01      | 2.62E-02           | 1.67E+00   | 1.15E-01             | 6.73E-09     |
| BipolarVsSchizo PGC (schizo only)             | 9369      | 19423    | 3.79E-01      | 4.23E-02           | 1.66E+00   | 1.85E-01             | 1.14E-04     |
| BMI GIANT (BMI) 2010                          | NA        | 249796   | 3.58E-01      | 3.62E-02           | 1.57E+00   | 1.59E-01             | 3.25E-04     |
| BMI GIANT (Height) 2010                       | NA        | 183727   | 4.50E-01      | 3.09E-02           | 1.97E+00   | 1.35E-01             | 2.38E-11     |
| Bowel Disease IBD (Europe Crohn's Disease)    | 5956      | 21770    | 4.40E-01      | 4.95E-02           | 1.93E+00   | 2.17E-01             | 7.40E-06     |
| Bowel Disease IBD (Europe Ulcerative Colitis) | 6968      | 21770    | 5.55E-01      | 6.41E-02           | 2.43E+00   | 2.81E-01             | 2.77E-07     |
| Bowel Disease IBD (Europe IBD)                | 12924     | 21770    | 5.30E-01      | 5.16E-02           | 2.32E+00   | 2.26E-01             | 4.15E-10     |
| Diabetes DIAGRAM Trans-ethnic T2D GWAS        | 27206     | 57574    | 3.92E-01      | 5.80E-02           | 1.72E+00   | 2.54E-01             | 1.55E-03     |

**Table S7C. Partitioned heritability of all shared xQTL SNPs vs. all other xQTL SNPs**

Stratified LD score regression applied to estimate partitioned heritability with all shared xQTL SNPs as one category, all other xQTL SNPs as another category, and all SNPs as background

Window sizes for eQTL, mQTL, and haQTL analysis were 100Kb, 100Kb, and 100Kb, respectively

Prop.\_SNPs = 0.04 and 0.19 for shared xQTL SNPs and all other xQTL SNPs, respectively

Prop.\_h2 denotes proportion of heritability

| GWAS dataset                                  | #Subjects |          | All xQTL SNPs that are shared across any xQTL types |                    |            |                      |              |  |
|-----------------------------------------------|-----------|----------|-----------------------------------------------------|--------------------|------------|----------------------|--------------|--|
|                                               | Cases     | Controls | Prop._h2                                            | Prop._h2_std_error | Enrichment | Enrichment_std_error | Enrichment_p |  |
| ADHD PGC                                      | 2960      | 6583     | -6.06E-02                                           | 1.17E-01           | -1.69E+00  | 3.24E+00             | 3.28E-01     |  |
| Alzheimer IGAP (stage 1)                      | 17008     | 37154    | 2.20E-01                                            | 7.26E-02           | 6.12E+00   | 2.02E+00             | 1.33E-03     |  |
| Anxiety ANGST (case-control)                  | 17130     |          | -5.14E-02                                           | 6.00E-02           | -1.43E+00  | 1.67E+00             | 1.18E-01     |  |
| Anxiety ANGST (factor score)                  | 18186     |          | 1.56E-01                                            | 1.04E-01           | 4.35E+00   | 2.88E+00             | 1.38E-01     |  |
| Autism PGC                                    | 5305      | 5305     | 5.64E-02                                            | 3.07E-02           | 1.57E+00   | 8.54E-01             | 4.97E-01     |  |
| Bipolar PGC                                   | 11974     | 51792    | 1.22E-01                                            | 2.59E-02           | 3.40E+00   | 7.19E-01             | 4.61E-04     |  |
| BipolarVsSchizo PGC (bipolar only)            | 10410     | 19423    | 1.32E-01                                            | 2.83E-02           | 3.67E+00   | 7.87E-01             | 4.51E-04     |  |
| MIDD CONVERGE                                 | 5303      | 5337     | 8.69E-02                                            | 5.27E-02           | 2.42E+00   | 1.47E+00             | 2.72E-01     |  |
| Schizophrenia2 PGC                            | 36989     | 113075   | 8.75E-02                                            | 1.17E-02           | 2.43E+00   | 3.24E-01             | 1.72E-05     |  |
| BipolarVsSchizo PGC (schizo only)             | 9369      | 19423    | 8.59E-02                                            | 1.65E-02           | 2.39E+00   | 4.59E-01             | 1.69E-03     |  |
| BMI GIANT (BMI) 2010                          | NA        | 249796   | 9.04E-02                                            | 1.60E-02           | 2.51E+00   | 4.46E-01             | 6.04E-04     |  |
| BMI GIANT (Height) 2010                       | NA        | 183727   | 1.66E-01                                            | 2.06E-02           | 4.63E+00   | 5.73E-01             | 6.78E-10     |  |
| Bowel Disease IBD (Europe Crohn's Disease)    | 5956      | 21770    | 2.02E-01                                            | 5.67E-02           | 5.61E+00   | 1.58E+00             | 9.33E-04     |  |
| Bowel Disease IBD (Europe Ulcerative Colitis) | 6968      | 21770    | 2.92E-01                                            | 8.20E-02           | 8.11E+00   | 2.28E+00             | 5.05E-04     |  |
| Bowel Disease IBD (Europe IBD)                | 12924     | 21770    | 2.28E-01                                            | 5.67E-02           | 6.34E+00   | 1.58E+00             | 8.05E-05     |  |
| Diabetes DIAGRAM Trans-ethnic T2D GWAS        | 27206     | 57574    | 1.76E-01                                            | 3.47E-02           | 4.89E+00   | 9.65E-01             | 9.92E-06     |  |

**Table S7C. Partitioned heritability of all shared xQTL SNPs vs. all other xQTL SNPs**

Stratified LD score regression applied to estimate partitioned heritability with all shared xQTL SNPs as one category, all other xQTL SNPs as another category, and all SNPs as background

Window sizes for eQTL, mQTL, and haQTL analysis were 100Kb, 100Kb, and 100Kb, respectively

Prop.\_SNPs = 0.04 and 0.19 for shared xQTL SNPs and all other xQTL SNPs, respectively

Prop.\_h2 denotes proportion of heritability

| GWAS dataset                                  | #Subjects |          | All other xQTL SNPs |                    |            |                      |              |  |
|-----------------------------------------------|-----------|----------|---------------------|--------------------|------------|----------------------|--------------|--|
|                                               | Cases     | Controls | Prop._h2            | Prop._h2_std_error | Enrichment | Enrichment_std_error | Enrichment_p |  |
| ADHD PGC                                      | 2960      | 6583     | 1.79E-01            | 2.39E-01           | 9.31E-01   | 1.24E+00             | 9.55E-01     |  |
| Alzheimer IGAP (stage 1)                      | 17008     | 37154    | 6.40E-01            | 1.49E-01           | 3.33E+00   | 7.75E-01             | 7.76E-05     |  |
| Anxiety ANGST (case-control)                  | 17130     |          | 4.73E-01            | 2.38E-01           | 2.46E+00   | 1.24E+00             | 1.34E-01     |  |
| Anxiety ANGST (factor score)                  | 18186     |          | 1.89E-02            | 2.28E-01           | 9.83E-02   | 1.19E+00             | 4.28E-01     |  |
| Autism PGC                                    | 5305      | 5305     | 3.28E-01            | 8.07E-02           | 1.70E+00   | 4.20E-01             | 9.43E-02     |  |
| Bipolar PGC                                   | 11974     | 51792    | 3.53E-01            | 5.14E-02           | 1.84E+00   | 2.67E-01             | 1.12E-03     |  |
| BipolarVsSchizo PGC (bipolar only)            | 10410     | 19423    | 3.93E-01            | 6.17E-02           | 2.04E+00   | 3.21E-01             | 4.31E-04     |  |
| MDD CONVERGE                                  | 5303      | 5337     | 2.17E-01            | 1.21E-01           | 1.13E+00   | 6.30E-01             | 8.28E-01     |  |
| Schizophrenia2 PGC                            | 36989     | 113075   | 3.16E-01            | 2.20E-02           | 1.64E+00   | 1.15E-01             | 5.43E-08     |  |
| BipolarVsSchizo PGC (schizo only)             | 9369      | 19423    | 3.45E-01            | 4.20E-02           | 1.79E+00   | 2.18E-01             | 1.96E-04     |  |
| BMI GIANT (BMI) 2010                          | NA        | 249796   | 2.97E-01            | 3.55E-02           | 1.54E+00   | 1.84E-01             | 2.72E-03     |  |
| BMI GIANT (Height) 2010                       | NA        | 183727   | 5.12E-01            | 3.33E-02           | 2.66E+00   | 1.73E-01             | 8.17E-18     |  |
| Bowel Disease IBD (Europe Crohn's Disease)    | 5956      | 21770    | 7.24E-01            | 1.01E-01           | 3.76E+00   | 5.26E-01             | 1.70E-09     |  |
| Bowel Disease IBD (Europe Ulcerative Colitis) | 6968      | 21770    | 8.03E-01            | 1.32E-01           | 4.17E+00   | 6.86E-01             | 2.72E-07     |  |
| Bowel Disease IBD (Europe IBD)                | 12924     | 21770    | 8.04E-01            | 9.57E-02           | 4.18E+00   | 4.98E-01             | 7.57E-11     |  |
| Diabetes DIAGRAM Trans-ethnic T2D GWAS        | 27206     | 57574    | 4.59E-01            | 6.93E-02           | 2.38E+00   | 3.60E-01             | 1.97E-05     |  |

**Table S8A. Number of SNPs detected with xQTL-weighted GWAS**

All = non-weighted

Tested = Weighting SNPs proximal to molecular features

LDSC Base = Weighting SNPs that are in the LD score regression baseline model

Union = Weighting SNPs belong to any of the xQTLs

Ovl = Weighting SNPs shared between any of the xQTL types

PLINK1.9 was applied to find SNPs in approximate linkage equilibrium ( $r^2 < 0.2$ ). Some studies used more stringent criterion, e.g.  $r^2 < 0.1$ . Their reported number of independent SNPs would thus be fewer comparing to this Table for those settings. Occasionally, the SNPs found by weighted GWAS might not cover all SNPs found by non-weighted GWAS. Hence, there are studies where new SNPs are found, but a few previously reported SNPs are dropped.

| Disease Study                                 | #significant SNPs |        |           |       |       |
|-----------------------------------------------|-------------------|--------|-----------|-------|-------|
|                                               | All               | Tested | LDSC Base | Union | Ovl   |
| ADHD PGC                                      | 0                 | 0      | 0         | 0     | 0     |
| Alzheimer IGAP (stage 1)                      | 1090              | 1090   | 1090      | 1094  | 1090  |
| Anxiety ANGST (case-control)                  | 7                 | 7      | 7         | 7     | 7     |
| Anxiety ANGST (factor score)                  | 54                | 56     | 55        | 54    | 54    |
| Autism PGC                                    | 1                 | 1      | 1         | 1     | 1     |
| Bipolar PGC                                   | 43                | 44     | 44        | 45    | 45    |
| BipolarVsSchizo PGC (bipolar only)            | 2                 | 2      | 2         | 5     | 8     |
| MDD CONVERGE                                  | 31                | 31     | 31        | 31    | 31    |
| Schizophrenia2 PGC                            | 12897             | 12915  | 12905     | 13338 | 13007 |
| BipolarVsSchizo PGC (schizo only)             | 48                | 48     | 48        | 78    | 98    |
| Blood Pressure ICBP (systolic)                | 111               | 112    | 111       | 113   | 111   |
| Blood Pressure ICBP (diastolic)               | 88                | 89     | 89        | 111   | 94    |
| BMI GIANT (BMI) 2010                          | 772               | 775    | 773       | 842   | 784   |
| BMI GIANT (Height) 2010                       | 4663              | 4665   | 4665      | 4838  | 4742  |
| BMI GIANT (WHRadjBMI) 2010                    | 299               | 302    | 299       | 300   | 301   |
| Bowel Disease IBD (Europe Crohn's Disease)    | 6024              | 6155   | 6070      | 6200  | 6101  |
| Bowel Disease IBD (Europe Ulcerative Colitis) | 9890              | 9890   | 9925      | 9978  | 9986  |
| Bowel Disease IBD (Europe IBD)                | 12950             | 12975  | 13022     | 13189 | 13096 |
| Diabetes DIAGRAM Trans-ethnic T2D GWAS        | 548               | 559    | 555       | 552   | 549   |

**Table S8A. Number of SNPs detected with xQTL-weighted GWAS**

All = non-weighted

Tested = Weighting SNPs proximal to molecular features

LDSC Base = Weighting SNPs that are in the LD score regression baseline model

Union = Weighting SNPs belong to any of the xQTLs

Ovl = Weighting SNPs shared between any of the xQTL types

PLINK1.9 was applied to find SNPs in approximate linkage equilibrium ( $r^2 < 0.2$ ). Some studies used more stringent criterion, e.g.  $r^2 < 0.1$ . Their reported number of independent SNPs would thus be fewer comparing to this Table for those settings. Occasionally, the SNPs found by weighted GWAS might not cover all SNPs found by non-weighted GWAS. Hence, there are studies where new SNPs are found, but a few previously reported SNPs are dropped.

| Disease Study                                 | #independent significant SNPs |        |           |       |     |
|-----------------------------------------------|-------------------------------|--------|-----------|-------|-----|
|                                               | All                           | Tested | LDSC Base | Union | Ovl |
| ADHD PGC                                      | 0                             | 0      | 0         | 0     | 0   |
| Alzheimer IGAP (stage 1)                      | 80                            | 80     | 80        | 80    | 80  |
| Anxiety ANGST (case-control)                  | 1                             | 1      | 1         | 1     | 1   |
| Anxiety ANGST (factor score)                  | 1                             | 1      | 1         | 1     | 1   |
| Autism PGC                                    | 1                             | 1      | 1         | 1     | 1   |
| Bipolar PGC                                   | 4                             | 4      | 4         | 4     | 5   |
| BipolarVsSchizo PGC (bipolar only)            | 1                             | 1      | 1         | 3     | 1   |
| MDD CONVERGE                                  | 2                             | 2      | 2         | 2     | 2   |
| Schizophrenia2 PGC                            | 264                           | 262    | 267       | 270   | 273 |
| BipolarVsSchizo PGC (schizo only)             | 4                             | 4      | 4         | 5     | 6   |
| Blood Pressure ICBP (systolic)                | 8                             | 9      | 8         | 10    | 10  |
| Blood Pressure ICBP (diastolic)               | 10                            | 10     | 10        | 10    | 10  |
| BMI GIANT (BMI) 2010                          | 35                            | 34     | 35        | 40    | 35  |
| BMI GIANT (Height) 2010                       | 237                           | 236    | 238       | 245   | 243 |
| BMI GIANT (WHRadjBMI) 2010                    | 13                            | 13     | 13        | 13    | 14  |
| Bowel Disease IBD (Europe Crohn's Disease)    | 176                           | 173    | 178       | 171   | 175 |
| Bowel Disease IBD (Europe Ulcerative Colitis) | 264                           | 264    | 264       | 255   | 263 |
| Bowel Disease IBD (Europe IBD)                | 263                           | 256    | 263       | 255   | 264 |
| Diabetes DIAGRAM Trans-ethnic T2D GWAS        | 46                            | 47     | 47        | 47    | 46  |

**Table S8A. Number of SNPs detected with xQTL-weighted GWAS**

All = non-weighted

Tested = Weighting SNPs proximal to molecular features

LDSC Base = Weighting SNPs that are in the LD score regression baseline model

Union = Weighting SNPs belong to any of the xQTLs

Ovl = Weighting SNPs shared between any of the xQTL types

PLINK1.9 was applied to find SNPs in approximate linkage equilibrium ( $r^2 < 0.2$ ).

Some studies used more stringent criterion, e.g.  $r^2 < 0.1$ . Their reported number of independent SNPs would thus be fewer comparing to this Table for those settings.

Occasionally, the SNPs found by weighted GWAS might not cover all SNPs found by non-weighted GWAS. Hence, there are studies where new SNPs are found, but a few previously reported SNPs are dropped.

| Disease Study                                 | #added indep SNPs wrt All |           |       |     |
|-----------------------------------------------|---------------------------|-----------|-------|-----|
|                                               | Tested                    | LDSC Base | Union | Ovl |
| ADHD PGC                                      | 0                         | 0         | 0     | 0   |
| Alzheimer IGAP (stage 1)                      | 0                         | 0         | 1     | 0   |
| Anxiety ANGST (case-control)                  | 0                         | 0         | 0     | 0   |
| Anxiety ANGST (factor score)                  | 0                         | 0         | 0     | 0   |
| Autism PGC                                    | 0                         | 0         | 0     | 0   |
| Bipolar PGC                                   | 0                         | 0         | 0     | 2   |
| BipolarVsSchizo PGC (bipolar only)            | 0                         | 0         | 2     | 1   |
| MDD CONVERGE                                  | 0                         | 0         | 0     | 0   |
| Schizophrenia2 PGC                            | 7                         | 4         | 22    | 10  |
| BipolarVsSchizo PGC (schizo only)             | 0                         | 0         | 1     | 2   |
| Blood Pressure ICBP (systolic)                | 1                         | 0         | 2     | 2   |
| Blood Pressure ICBP (diastolic)               | 0                         | 0         | 1     | 0   |
| BMI GIANT (BMI) 2010                          | 0                         | 0         | 5     | 1   |
| BMI GIANT (Height) 2010                       | 2                         | 2         | 18    | 8   |
| BMI GIANT (WHRadjBMI) 2010                    | 0                         | 0         | 0     | 1   |
| Bowel Disease IBD (Europe Crohn's Disease)    | 4                         | 3         | 3     | 0   |
| Bowel Disease IBD (Europe Ulcerative Colitis) | 0                         | 6         | 8     | 5   |
| Bowel Disease IBD (Europe IBD)                | 5                         | 5         | 9     | 5   |
| Diabetes DIAGRAM Trans-ethnic T2D GWAS        | 1                         | 1         | 1     | 0   |



**Table S8B. Number of SNPs detected with eQTL-weighted GWAS**

ROSMAP = Weighting ROSMAP eQTL SNPs

DGN = Weighting DGN eQTL SNPs

PLINK1.9 was applied to find SNPs in approximate linkage equilibrium ( $r^2 < 0.2$ ). Some studies used more stringent criterion, e.g.  $r^2 < 0.1$ . Their reported number of independent SNPs would thus be fewer comparing to this Table for those settings. Occasionally, the SNPs found by weighted GWAS might not cover all SNPs found by non-weighted GWAS. Hence, there are studies where new SNPs are found, but a few previously reported SNPs are dropped.

| GWAS dataset                                  | #significant SNPs |       | #independent significant SNPs |     | #added indep SNPs wrt All |     |
|-----------------------------------------------|-------------------|-------|-------------------------------|-----|---------------------------|-----|
|                                               | ROSMAP            | DGN   | ROSMAP                        | DGN | ROSMAP                    | DGN |
| ADHD PGC                                      | 0                 | 0     | 0                             | 0   | 0                         | 0   |
| Alzheimer IGAP (stage 1)                      | 1090              | 1091  | 80                            | 80  | 0                         | 0   |
| Anxiety ANGST (case-control)                  | 7                 | 7     | 2                             | 1   | 1                         | 0   |
| Anxiety ANGST (factor score)                  | 54                | 54    | 1                             | 1   | 0                         | 0   |
| Autism PGC                                    | 1                 | 1     | 1                             | 1   | 0                         | 0   |
| Bipolar PGC                                   | 47                | 43    | 4                             | 6   | 1                         | 2   |
| BipolarVsSchizo PGC (bipolar only)            | 2                 | 3     | 1                             | 2   | 0                         | 1   |
| MIDD CONVERGE                                 | 31                | 32    | 2                             | 3   | 0                         | 1   |
| Schizophrenia2 PGC                            | 13425             | 12903 | 267                           | 274 | 17                        | 9   |
| BipolarVsSchizo PGC (schizo only)             | 130               | 51    | 7                             | 4   | 2                         | 1   |
| Blood Pressure ICBP (systolic)                | 111               | 112   | 9                             | 11  | 1                         | 3   |
| Blood Pressure ICBP (diastolic)               | 100               | 93    | 11                            | 11  | 2                         | 1   |
| BMI GIANT (BMI) 2010                          | 854               | 774   | 36                            | 35  | 2                         | 0   |
| BMI GIANT (Height) 2010                       | 4813              | 4685  | 241                           | 240 | 12                        | 3   |
| BMI GIANT (WHRadjBMI) 2010                    | 301               | 301   | 13                            | 14  | 0                         | 1   |
| Bowel Disease IBD (Europe Crohn's Disease)    | 6164              | 6035  | 173                           | 180 | 0                         | 4   |
| Bowel Disease IBD (Europe Ulcerative Colitis) | 9981              | 9896  | 257                           | 264 | 5                         | 0   |
| Bowel Disease IBD (Europe IBD)                | 13265             | 12955 | 257                           | 265 | 8                         | 2   |
| Diabetes DIAGRAM Trans-ethnic T2D GWAS        | 548               | 548   | 46                            | 46  | 0                         | 0   |
